# Supplementary material for: Aberrant newborn T cell and microbiota developmental trajectories predict respiratory compromise during infancy
Source: PubMed Central journal article supplement (PMC8931366; doi:10.1016/j.isci.2022.104007), 2022-03-01
Supplement: mmc1.pdf [file mmc1.pdf]

**Supplemental information**

**Aberrant newborn T cell and microbiota  
developmental trajectories predict  
respiratory compromise during infancy**

**Andrew McDavid, Nathan Laniewski, Alex Grier, Ann L. Gill, Haeja A. Kessler, Heidie Huyck, Elizabeth Carbonell, Jeanne Holden-Wiltse, Sanjukta Bandyopadhyay, Jennifer Carnahan, Andrew M. Dylag, David J. Topham, Ann R. Falsey, Mary T. Caserta, Gloria S. Pryhuber, Steven R. Gill, and Kristin M. Scheible**

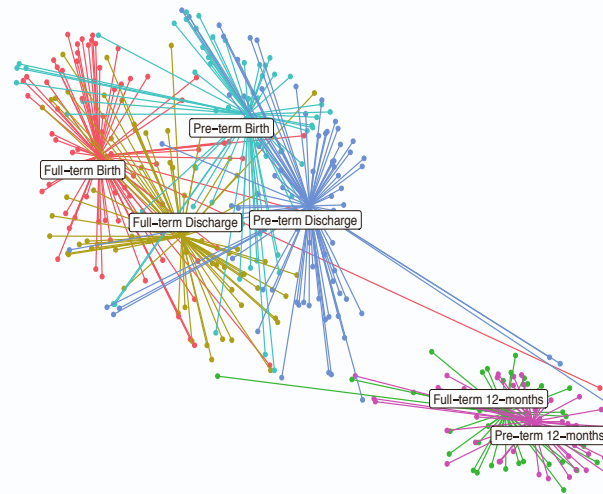

**Supplementary figure 1, related to figure 2. UMAP of representing the relative abundances of 80 T cell populations.** Each point represents a sample, and is colored according to the timepoint of sampling and cohort.

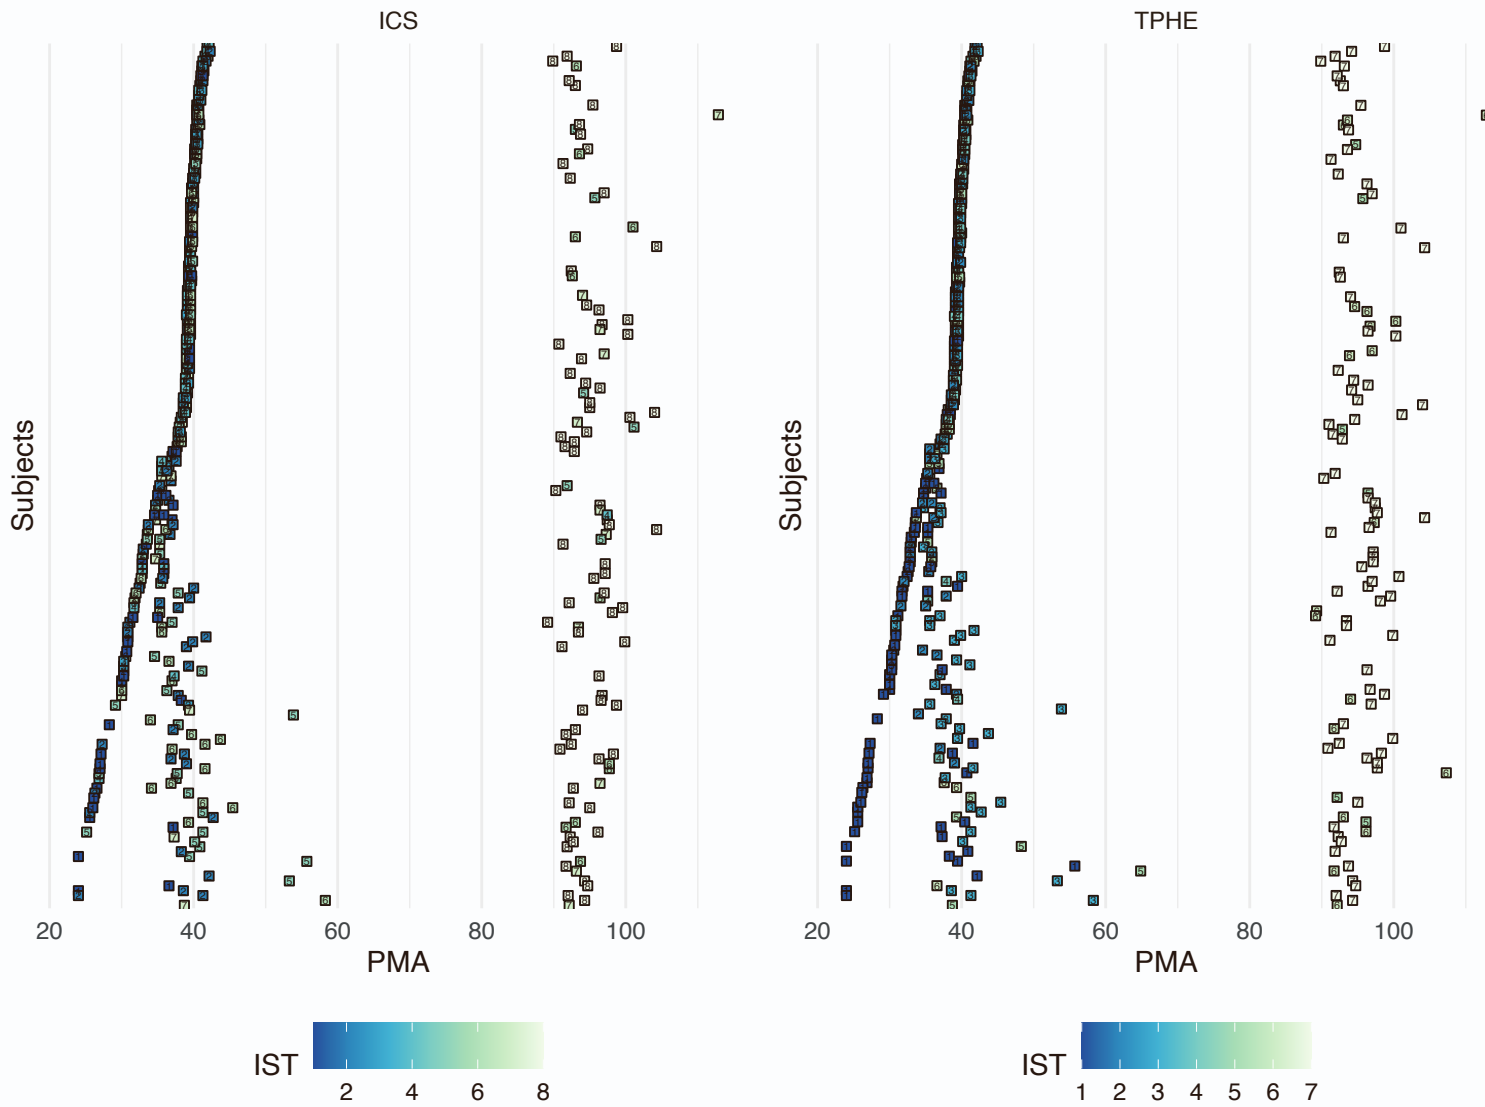

Supplementary figure 2, related to figure 3. Time points, as measured in post-menstrual age (PMA) when subjects (rows) were sampled for T cell ICS, T cell TPHE. The immune state type assigned to that sample is indicated by the hue.

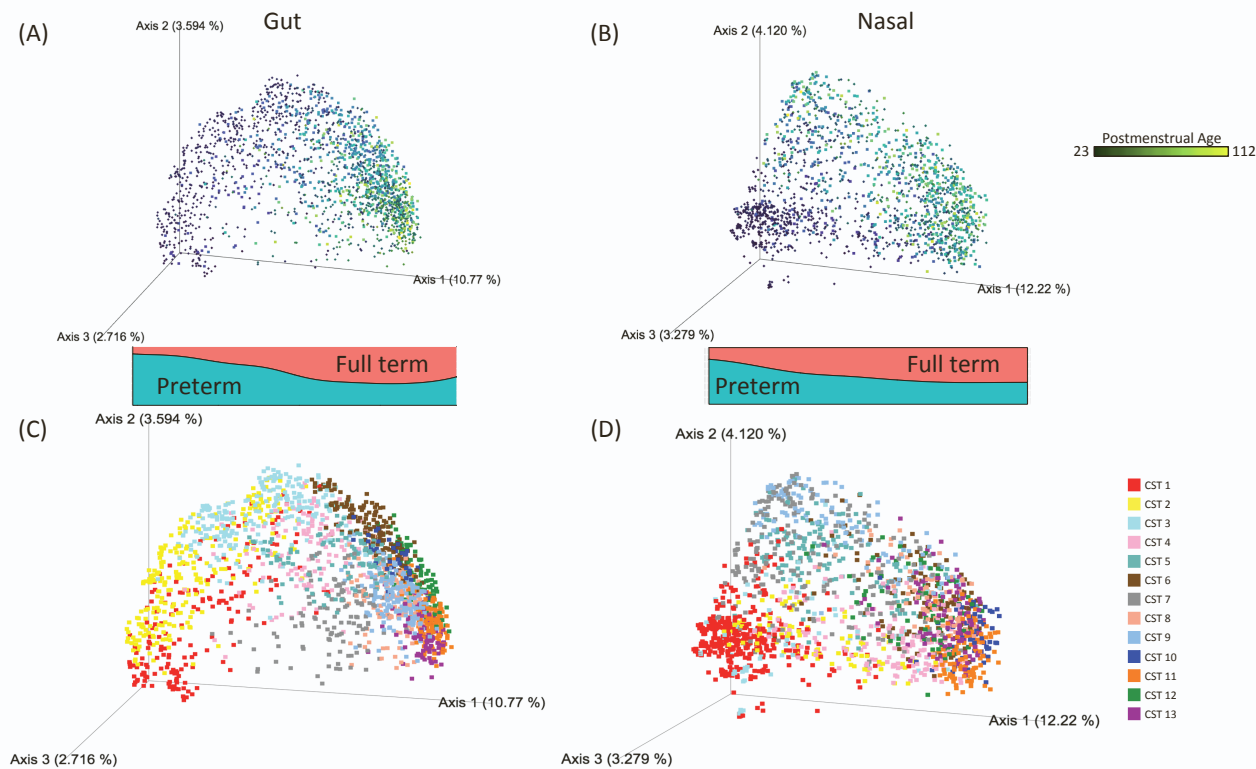

**Supplementary figure 3, related to figure 4. Nasal and gut microbiota shifts in the first year of life among preterm and full term infants track with postmenstrual age.** Microbiota community profiling was performed on rectal (A, C) and nasal (B, D) samples obtained from 159 infants during regular surveillance and acute respiratory illness. (A-D) Principal coordinate analysis (PCOA) plots using Unweighted Unifrac distances summarize overall variation and structure. (A-B) Points were colored by postmenstrual age (PMA) at the time the sample was obtained. Colored bands at the base of PCOA plots show the proportion of samples along each point of axis 1 that are from either preterm (teal) or full term (salmon) subjects. (C and D) Microbiota community state types (CST) were defined for each body site, with samples in the PCOA colored according to the CST they represent. CSTs are ordered according to average PMA of occurrence.

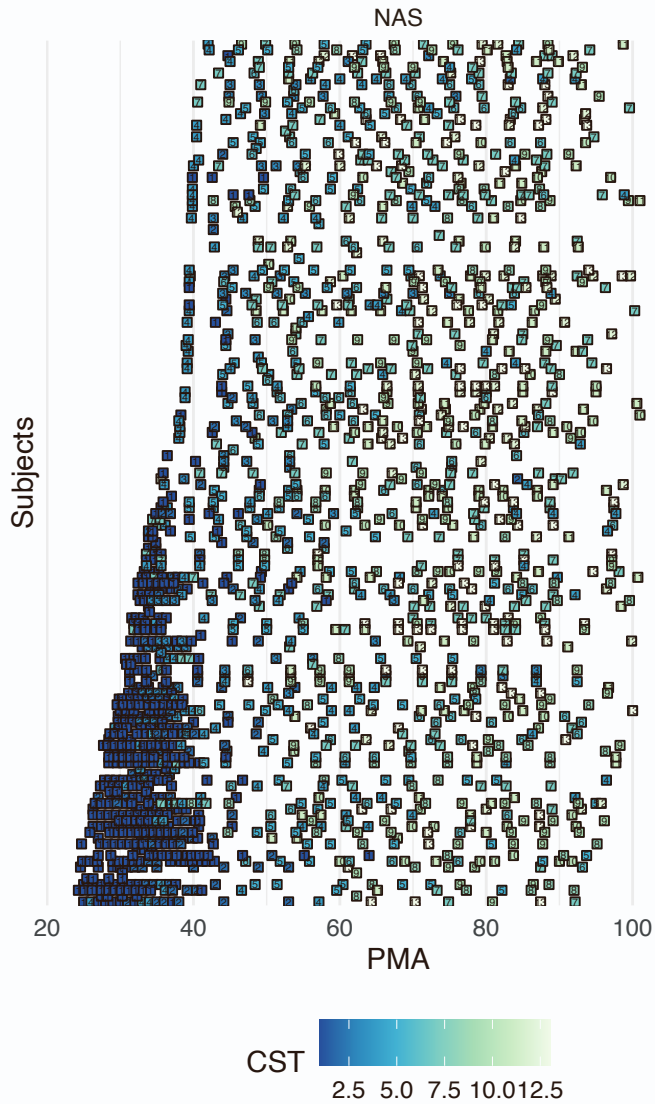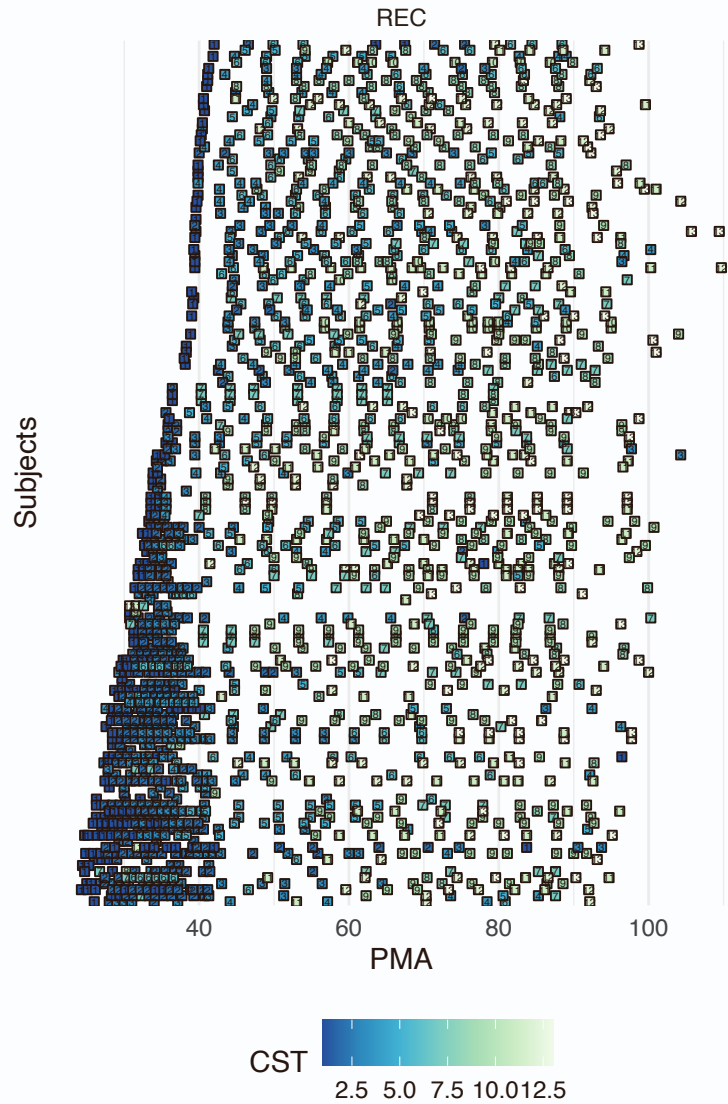

Supplementary figure 4, related to figure 4. Time points, as measured in post-menstrual age (PMA) when subjects (rows) were sampled for nasal or rectal microbiome profiling. The community state type assigned to that sample is indicated by the hue.



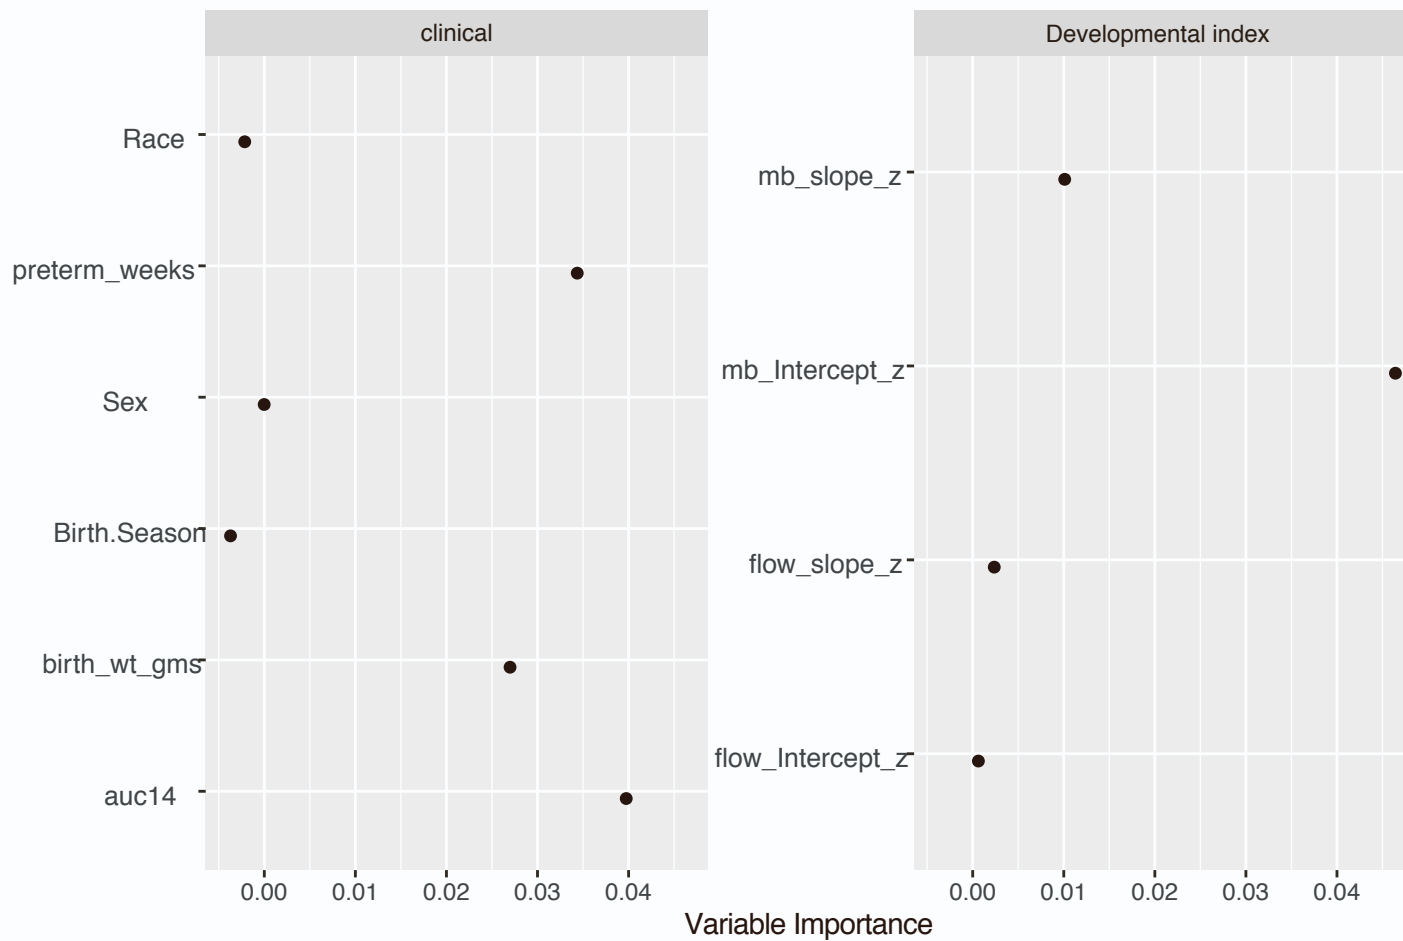

**Supplementary fig 6, related to figure 6. Random forest variable importance plots for clinical and developmental index models.** Larger values represent greater decreases in the Gini purity coefficient. Importance was calculated using the default method in R package randomForestSRC version 2.7.0.

| TPHE         | subjects   | samples    |
|--------------|------------|------------|
| 3 timepoints | 78         | 234        |
| 2 timepoints | 82         | 164        |
| 1 timepoint  | 16         | 16         |
| <b>total</b> | <b>176</b> | <b>414</b> |

| TPHE         | samples    | pre-term   | full-term  |
|--------------|------------|------------|------------|
| birth        | 147        | 65         | 82         |
| discharge    | 163        | 87         | 76         |
| 12-month     | 104        | 58         | 46         |
| <b>total</b> | <b>414</b> | <b>210</b> | <b>204</b> |

| ICS          | subjects   | samples    |
|--------------|------------|------------|
| 3 timepoints | 69         | 207        |
| 2 timepoints | 89         | 178        |
| 1 timepoint  | 19         | 19         |
| <b>total</b> | <b>177</b> | <b>404</b> |

| ICS          | samples    | pre-term   | full-term  |
|--------------|------------|------------|------------|
| birth        | 147        | 64         | 83         |
| discharge    | 155        | 84         | 71         |
| 12-month     | 102        | 55         | 47         |
| <b>total</b> | <b>404</b> | <b>203</b> | <b>201</b> |

| TPHE_ICs     | subjects   | samples    |
|--------------|------------|------------|
| 3 timepoints | 67         | 201        |
| 2 timepoints | 83         | 166        |
| 1 timepoint  | 18         | 18         |
| <b>total</b> | <b>168</b> | <b>385</b> |

| TPHE_ICs     | samples    | pre-term   | full-term  |
|--------------|------------|------------|------------|
| birth        | 141        | 63         | 78         |
| discharge    | 150        | 81         | 69         |
| 12-month     | 94         | 51         | 43         |
| <b>total</b> | <b>385</b> | <b>195</b> | <b>190</b> |

**Supplementary Table 1, related to figures 1-3, 5-6.** Subject numbers for immunophenotyping,



| Panels Measured      |             |          |           |              |    |
|----------------------|-------------|----------|-----------|--------------|----|
| Number of timepoints | Cohort      | ICS only | TPHE only | ICS and TPHE |    |
|                      | 1 Full term |          | 0         | 1            | 6  |
|                      | Pre term    |          | 1         | 2            | 10 |
|                      | 2 Full term |          | 5         | 0            | 36 |
|                      | Pre term    |          | 2         | 4            | 47 |
|                      | 3 Full term |          | 0         | 2            | 37 |
|                      | Pre term    |          | 1         | 1            | 30 |

**Supplementary Table 2, related to figures 1-3, 5-6.** Number of timepoints measured per subject by T cell flow cytometry panel by term.

| <b>Figure Description</b>                  | <b>Site</b> | <b>Samples</b> | <b>Subjects</b> |
|--------------------------------------------|-------------|----------------|-----------------|
| <b>Microbiome CGA &amp; CST PCoA plots</b> | Both NAS    | 1748           | 149             |
|                                            | Both REC    | 1899           | 143             |
| <b>Microbiome CST Occurrence Over CGA</b>  | NAS         | 1748           | 149             |
|                                            | REC         | 1899           | 143             |
| <b>Microbiome Composition Heatmaps</b>     | NAS         | 1748           | 149             |
|                                            | REC         | 1899           | 143             |
| <b>Immuno IST Composition Heatmaps</b>     | TPHE        | 414            | 176             |
|                                            | ICS         | 404            | 177             |
| <b>Immuno IST Occurrence Over CGA</b>      | TPHE        | 414            | 176             |
|                                            | ICS         | 404            | 177             |
| <b>Immuno IST Avg. Occurrence GAB/CGA</b>  | TPHE        | 414            | 176             |
|                                            | ICS         | 404            | 177             |
| <b>NAS 8 Occurrence vs TPHE ISTs</b>       | Birth       | 68             | 68              |
|                                            | Discharge   | 95             | 95              |
| <b>CST-Immuno Association Networks</b>     | NAS         | 1589           | 109             |
|                                            | REC         | 1697           | 117             |

**Supplementary Table 3, related to figures 1, 4-6.** Subject numbers microbiome and combined analyses.

| Predictors       | Response | BIC     | Adjusted R2 | Total R2 | log10(p) vs worst model |
|------------------|----------|---------|-------------|----------|-------------------------|
| DOL + Term       | T cell   | 10,900  | 0.166       | 0.184    | 0                       |
| DOL + Term       | NAS      | 212,436 | 0.055       | 0.075    | 0                       |
| DOL + Term       | REC      | 599,240 | 0.028       | 0.036    | 0                       |
| PMA + Term       | T cell   | 10,786  | 0.179       | 0.197    | -50                     |
| PMA + Term       | NAS      | 212,085 | 0.066       | 0.085    | -153                    |
| PMA + Term       | REC      | 599,023 | 0.031       | 0.038    | -94                     |
| DOL + PMA + Term | T cell   | 10,606  | 0.017       | 0.211    | -128                    |
| DOL + PMA + Term | NAS      | 211,896 | 0.007       | 0.091    | -235                    |
| DOL + PMA + Term | REC      | 598,654 | 0.004       | 0.042    | -255                    |

**Supplementary Table 4, related to figure 1.** Model statistics for multivariate ANOVA. T cell population relative abundances, gut, and nasal species-level relative abundances were modeled as response variables, using indicated combinations of predictors. The BIC was calculated as  $-2 \cdot \log\text{-likelihood} + p \cdot \log(n)$ , where  $p$  is the number of predictors and  $n$  is the number of observations. The Adjusted R2 was calculated as  $1 - \text{MSE}_{\text{full}} / \text{MSE}_{\text{reduced}}$ , where  $\text{MSE}_{\text{reduced}}$  is the mean square error in a model that excluded the first indicated predictor in the Predictors column. The total R2 uses the intercept-only in the reduced model.  $\log_{10}(p)$  vs worst model was calculated as  $\log_{10}(e) \cdot [\text{BIC} - \log(\sum(\exp(\text{BIC})))]$ , the sum being over all combinations of models for that Response.

| Cytometer: BDLSRII (URMC FlowCore - Animal) |           |           |     |          |               |              |            |                   |                        |
|---------------------------------------------|-----------|-----------|-----|----------|---------------|--------------|------------|-------------------|------------------------|
| Tphe Functional Panel (RPRC 12-0012)        |           |           |     |          |               |              |            |                   |                        |
| Laser                                       | Long Pass | Band Pass | PMT | Detector | Marker        | Color        | Clone      | Company           | Catalog #              |
| 488                                         | 505       | 515/20    | BB  | B515     | CD122         | BB 515       | Mik-β      | BD Biosciences    | 564688                 |
| 488                                         | 685       | 710/50    | BA  | B710     | Perforin      | PerCP-Cy5.5  | dG9        | Biolegend         | 308114                 |
| 407                                         |           | 450/50    | VH  | V450     | Granzyme B    | BV 421       | GB11       | BD Biosciences    | 563389                 |
| 407                                         | 535       | 550/40    | VG  | V550     | Live/Dead     | Aqua         |            | Life Technologies | L34957                 |
| 407                                         | 570       | 585/42    | VE  | V585     | CD3           | BV 570       | UCHT1      | Biolegend         | 300436                 |
| 407                                         | 595       | 605/40    | VD  | V605     | CD31          | BV 605       | WM59       | BD Biosciences    | 562855                 |
| 407                                         | 630       | 660/40    | VC  | V660     | CD127         | BV 650       | HIL-7R-M21 | BD Biosciences    | 563225                 |
| 407                                         | 670       | 705/70    | VB  | V705     | CD45RO        | BV 711       | UCHL1      | BD Biosciences    | 563722                 |
| 407                                         | 740       | 780/60    | VA  | V780     | CD8a          | BV 785       | RPA-T8     | Biolegend         | 301045                 |
| 633                                         |           | 660/20    | RC  | R660     | KLRG1         | APC          | 13F12F2    | eBioscience       | 17-9488-42             |
| 633                                         | 685       | 710/50    | RB  | R710     | CD185 (CXCR4) | APC-R700     | RF8B2      | BD Biosciences    | 565191                 |
| 633                                         | 740       | 780/60    | RA  | R780     | CD197 (CCR7)  | APC-Cy7      | G043H7     | Biolegend         | 353212                 |
| 532                                         |           | 575/24    | GE  | G575     | Foxp3         | PE           | 236A/E7    | eBioscience       | 12-4777-42             |
| 532                                         | 600       | 610/20    | GD  | G610     | CD4           | PE-TR        | S3.5       | Invitrogen        | MHCD0417               |
| 532                                         | 640       | 660/40    | GC  | G660     | CD28          | PE-Cy5       | CD28.2     | BD Biosciences    | 561791                 |
| 532                                         | 740       | 780/40    | GA  | G780     | CD57          | PE-Cy7       | TB01       | eBioscience       | 25-0577-42             |
| ICS Functional Panel (RPRC 12-0012)         |           |           |     |          |               |              |            |                   |                        |
| Cytometer: BDLSRII (URMC FlowCore - Animal) |           |           |     |          |               |              |            |                   |                        |
| Laser                                       | Long Pass | Band Pass | PMT | Detector | Marker        | Color        | Clone      | Company           | Catalog #              |
| 488                                         | 505       | 515/20    | BB  | B515     | IL-8          | FITC         | E8N1       | BioLegend         | <a href="#">511406</a> |
| 407                                         |           | 450/50    | VH  | V450     | IL-17         | Pacific Blue | BL168      | BioLegend         | 512312                 |
| 407                                         | 535       | 550/40    | VG  | V550     | Live/Dead     | Aqua         | polyclonal | Life Technologies | L34957                 |
| 407                                         |           |           |     |          | CD14          | BV510        | MφP9       | BD Biosciences    | <a href="#">563079</a> |
| 407                                         | 570       | 585/42    | VE  | V585     | CD8a          | BV570        | RPA-T8     | BioLegend         | <a href="#">301037</a> |
| 407                                         | 595       | 605/40    | VD  | V605     | IL-2          | BV605        | MQ1-17H12  | BD Biosciences    | <a href="#">564165</a> |
| 407                                         | 630       | 660/40    | VC  | V660     | CD45RA        | BV650        | HI100      | BD Biosciences    | <a href="#">563963</a> |
| 407                                         | 670       | 705/70    | VB  | V705     | IL-10         | BV711        | JES3-9D7   | BD Biosciences    | <a href="#">564050</a> |
| 407                                         | 740       | 780/60    | VA  | V780     | TNFa          | BV785        | MAb11      | BioLegend         | <a href="#">502948</a> |
| 633                                         |           | 660/20    | RC  | R660     | IL-6          | APC          | MQ2-13A5   | BD Biosciences    | <a href="#">561441</a> |
| 633                                         | 685       | 710/50    | RB  | R710     | CD3           | AF700        | UCHT1      | BD Biosciences    | <a href="#">557943</a> |
| 633                                         | 740       | 780/60    | RA  | R780     | CD69          | APC-Cy7      | FN50       | BioLegend         | 310914                 |
| 532                                         |           | 575/24    | GE  | G575     | IL-4          | PE           | MP4-25D2   |                   |                        |
| 532                                         | 600       | 610/20    | GD  | G610     | CD107a        | PE-CF594     | H4A3       | BD Biosciences    | 562628                 |
| 532                                         | 690       | 710/50    | GB  | G710     | CD4           | PE-Cy5.5     | S3.5       | ThermoFischer     | MHCD0418               |
| 532                                         | 740       | 780/40    | GA  | G780     | IFN-g         | PE-Cy7       | B27        | BD Biosciences    | <a href="#">557643</a> |

**Supplementary Table 5, related to figures 1-3, 5-6. Flow Cytometry Panels.**
